# Supplementary material for: Novel superconducting structures of BH2 under high pressure
Source: Royal Society of Chemistry journal article supplement (doi:10.1039/c9cp00310j), 2019-01-01
Supplement: c9cp00310j1.pdf [file c9cp00310j1.pdf]

## Supporting Information

### Novel superconducting structures of BH<sub>2</sub> under high pressure

Wen-Hua Yang,<sup>\*a</sup> Wen-Cai Lu,<sup>\*ab</sup> Shan-Dong Li,<sup>a</sup> Xu-Yan Xue,<sup>a</sup> Qing-Jun Zang,<sup>a</sup>

<sup>a</sup>College of Physics and Laboratory of Fiber Materials and Modern Textile, Growing Base for  
State Key Laboratory, Qingdao University, Qingdao, Shandong 266071, P. R. China

<sup>b</sup>Institute of Theoretical Chemistry, Jilin University, Changchun, Jilin 130021, P. R. China

K. M. Ho<sup>c</sup> and C. Z. Wang<sup>c</sup>

<sup>c</sup>Ames Laboratory-U.S. DOE and Department of Physics and Astronomy, Iowa State University,  
Ames, IA 50011, U.S.A

## Supporting Information Tables

**Table S1. Detailed structural information of the predicted BH<sub>2</sub> compounds at selected pressures.**

| Phases                              | Pressure<br>(GPa) | Lattice parameters<br>(Å)                 | Atomic coordinates<br>(fractional)                     |
|-------------------------------------|-------------------|-------------------------------------------|--------------------------------------------------------|
| BH <sub>2</sub> -Cmcm               | 50                | a=10.668                                  | H (8f) 0.000 -0.251 0.380                              |
|                                     |                   | b=3.094                                   | H (8g) -0.395 -0.753 -1.250                            |
|                                     |                   | c=2.849                                   | B (8g) -0.290 -0.655 -0.250                            |
|                                     |                   | $\alpha=\beta=\gamma=90.000$              |                                                        |
| BH <sub>2</sub> -P2 <sub>1</sub> /c | 50                | a=4.527                                   | H (4e) 0.390 -0.274 0.120                              |
|                                     |                   | b=2.938                                   | H (4e) 0.768 -0.345 0.686                              |
|                                     |                   | c=4.842                                   | B (4e) 0.925 -0.903 1.102                              |
|                                     |                   | $\alpha=\gamma=90.000$<br>$\beta=133.242$ |                                                        |
| BH <sub>2</sub> -P2 <sub>1</sub> /m | 50                | a= 5.379                                  | H (2e) -0.104 -0.250 -0.164                            |
|                                     |                   | b=2.864                                   | H (2e) 0.889 0.250 -0.561                              |
|                                     |                   | c=3.068                                   | H (2e) 0.727 0.250 -0.175                              |
|                                     |                   | $\alpha=\gamma=90.000$                    | H (2e) 0.886 0.750 -0.929                              |
|                                     |                   | $\beta=104.704$                           | B (2e) 0.665 0.250 -0.610<br>B (2e) 0.497 0.250 -0.169 |
| BH <sub>2</sub> -C2/c               | 250               | a=2.474                                   | H (4e) -1.000 -0.106 2.250                             |
|                                     |                   | b=6.979                                   | H (4c) -1.250 0.250 0.500                              |
|                                     |                   | c=1.646                                   | B (4e) -0.500 0.097 -0.250                             |
|                                     |                   | $\alpha=\gamma=90.000$<br>$\beta=81.610$  |                                                        |
| BH <sub>2</sub> -C222 <sub>1</sub>  | 350               | a=2.365                                   | H (2a) 0.079 0.113 -0.080                              |
|                                     |                   | b=2.757                                   | H (2a) 0.651 1.201 0.199                               |
|                                     |                   | c=4.042                                   | H (2a) 0.453 1.201 0.594                               |
|                                     |                   | $\alpha=\gamma=90.000$                    | H (2a) -0.501 0.788 1.080                              |
|                                     |                   | $\beta=73.004$                            | B (2a) 0.852 0.701 0.796<br>B (2a) 0.055 0.701 0.390   |
| BH <sub>2</sub> -Cmcm               | 350               | a=2.362                                   | H (4c) -0.500 0.0460 0.250                             |
|                                     |                   | b=7.838                                   | H (8g) 0.292 0.212 1.250                               |
|                                     |                   | c=2.728                                   | H (4c) -0.500 0.149 -0.250                             |
|                                     |                   | $\alpha=\beta=\gamma=90.000$              | B (4c) 0.000 0.055 0.250                               |
|                                     |                   |                                           | B (4c) 0.000 -0.147 0.250                              |

Table S2. Detailed structural information of the predicted BH<sub>4</sub> and BH<sub>5</sub> compounds at selected pressures.

| Phases                          | Pressure (GPa)           | Lattice parameters (Å) | Atomic coordinates (fractional) |
|---------------------------------|--------------------------|------------------------|---------------------------------|
| BH <sub>4</sub> -P <sub>1</sub> | 50                       | a=2.974                | H(2i) 0.247 0.327 0.241         |
|                                 |                          | b=4.948                | H(2i) -0.250 0.043 0.594        |
|                                 |                          | c=5.395                | H(2i) -1.246 -0.873 1.226       |
|                                 |                          | α=62.972               | H(2i) -1.261 -0.464 1.065       |
|                                 |                          | β=90.411               | H(2i) -0.808 -0.289 1.227       |
|                                 |                          | γ=91.189               | H(2i) -1.737 -0.209 1.493       |
|                                 |                          |                        | H(2i) -1.731 -0.594 1.605       |
|                                 |                          |                        | H(2i) -1.755 -0.707 1.390       |
|                                 |                          |                        | B(2i) -0.786 -0.711 0.848       |
| BH <sub>4</sub> -C2/c           | 400                      | a=2.440                | H(8f) -0.223 0.038 0.501        |
|                                 |                          | b=9.266                | H(4c) -0.750 0.250 0.000        |
|                                 |                          | c=1.577                | H(4e) -0.500 0.352 0.750        |
|                                 |                          | α=γ=90.000             | B(4e) 0.000 0.361 1.750         |
|                                 |                          | β=105.531              |                                 |
| BH <sub>5</sub> -P <sub>1</sub> | 50                       | a=3.201                | H(2i) 0.168 0.174 -0.884        |
|                                 |                          | b=3.366                | H(2i) 0.261 -0.134 -0.401       |
|                                 |                          | c=4.586                | H(2i) 1.064 -0.187 -0.115       |
|                                 |                          | α=68.122               | H(2i) 0.797 -0.497 -0.345       |
|                                 |                          | β=109.992              | H(2i) 0.632 -0.214 0.155        |
|                                 |                          | γ=89.212               | B(2i) 0.612 -0.525 -0.630       |
| BH <sub>5</sub> -Cc             | 100                      | a=4.217                | H(4a) 0.027 0.828 1.928         |
|                                 |                          | b=7.333                | H(4a) 0.261 -0.072 0.829        |
|                                 |                          | c=2.963                | H(4a) -0.419 0.053 -0.963       |
|                                 |                          | α=γ=90.000             | H(4a) 0.0291 -0.050 0.554       |
|                                 |                          | β=133.772              | H(4a) 0.175 0.315 1.173         |
| BH <sub>5</sub> -P <sub>1</sub> | 400                      | a=2.415                | B(4a) 0.168 0.308 0.781         |
|                                 |                          | b=2.426                | H(2i) -0.264 0.379 -0.827       |
|                                 |                          | c=3.818                | H(2i) -0.202 0.126 -0.191       |
|                                 |                          | α=98.024               | H(2i) -0.395 0.674 -0.351       |
|                                 |                          | β=108.282              | H(2i) 0.277 0.327 -0.476        |
|                                 |                          | γ=68.276               | H(1b) 0.000 0.000 -0.500        |
|                                 |                          |                        | H(1c) 0.000 0.500 0.000         |
|                                 | B(2i) 0.284 0.121 -0.193 |                        |                                 |

Table S3. Calculated the EPC parameter  $\lambda$  of the C2/c-BH<sub>2</sub> structure at the pressures of 250 GPa with the different k-point meshes and q-point meshes.

|          |        | Denser k-points |          |          |          |          |
|----------|--------|-----------------|----------|----------|----------|----------|
|          |        | 12×12×24        | 16×16×32 | 18×18×36 | 20×20×40 | 24×24×48 |
| q-points | 2×2×4  | 0.814           | 0.770    |          | 0.814    | 0.833    |
|          | 3×3×6  | 0.729           |          | 0.647    |          | 0.614    |
|          | 4×4×8  |                 | 0.748    |          |          | 0.593    |
|          | 6×6×12 | 0.631           |          |          |          | 0.600    |

Supporting Information Figures

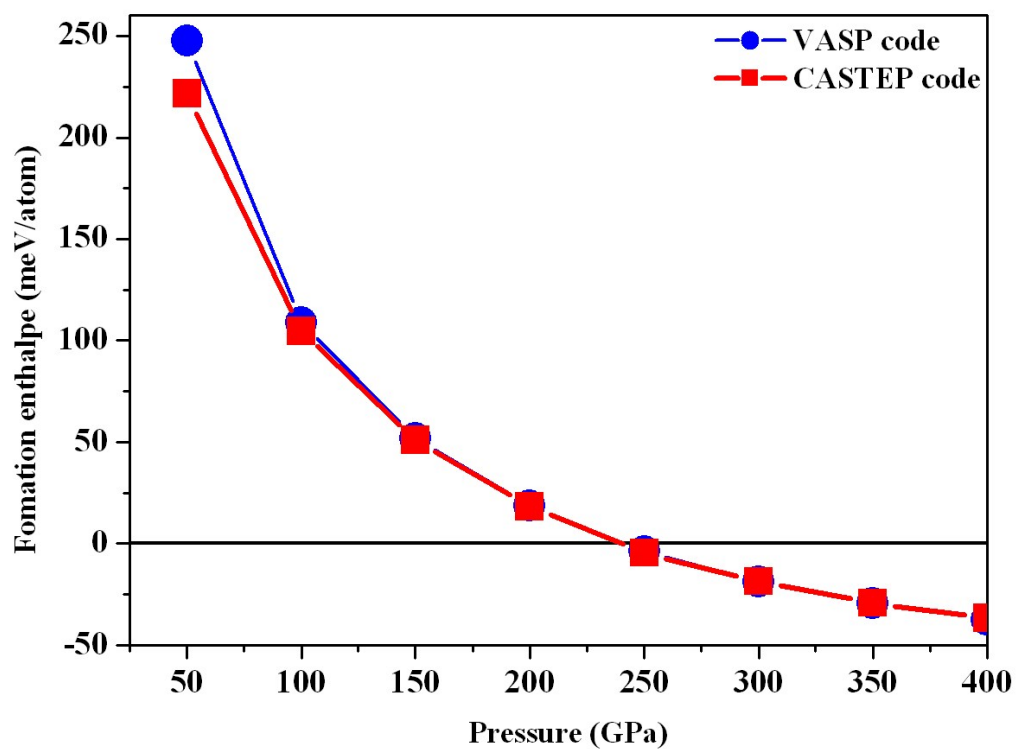

Fig. S1. Based on VASP and CASTEP codes, calculated formation enthalpies (in meV/atom) of C2/c-BH<sub>2</sub> with respect to B and H at the different pressures.

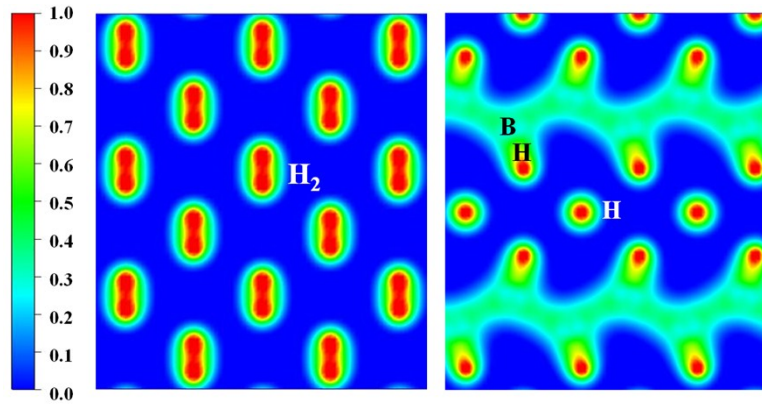

Fig. S2 2D-ELF of Cmcm-BH<sub>2</sub> on the (1,0,0) and (0,0,1) planes, respectively.

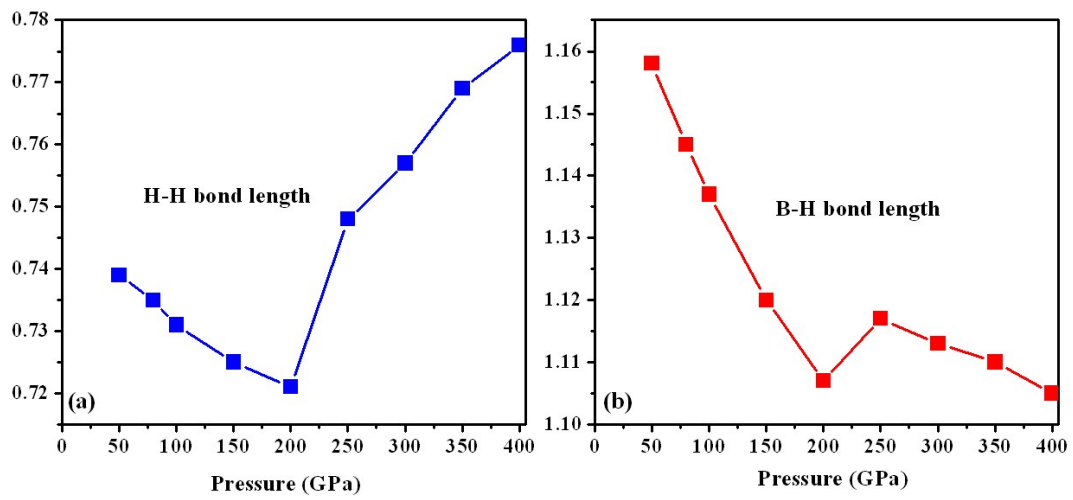

Fig. S3 Bond lengths (Å) of H-H in H<sub>2</sub> unit and B-H for the Cmcm-BH<sub>2</sub> as function of the pressure.

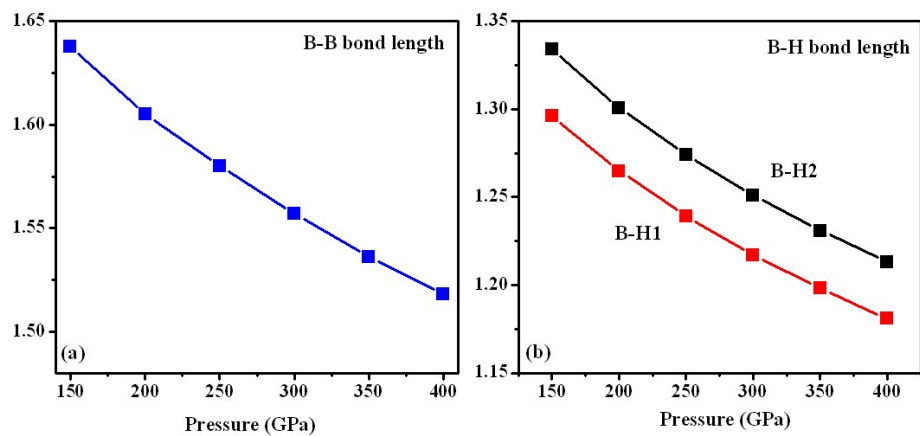

Fig. S4 Bond lengths ( $\text{\AA}$ ) of B-B and B-H for the C2/c-BH<sub>2</sub> as function of the pressure.
